# Supplementary material
Source: PubMed Central journal article supplement (PMC4201153)
Supplement: supp_btu435_Supplement.pdf [file supp_btu435_Supplement.pdf]

# Supplement - lrgpr: Interactive linear mixed model analysis of genome-wide association studies with composite hypothesis testing and regression diagnostics in R

Gabriel E. Hoffman, Jason G. Mezey, and Eric E. Schadt

**Supplementary Table 1:** Comparison of runtimes when the options for optimization of variance components in the linear mixed model are the same across multiple programs. The options are set so that the log-likelihood is maximized with respect to  $\delta$ , the ratio of variance components, in 100 intervals of  $\delta$  evenly spaced on a logarithmic scale between -10 and 10. This is the default setting for lrgpr and EMMA and thus results are shown in the main text. Here the options of GEMMA and FaST-LMM were set to be consistent with these settings. These options cannot be set for the other programs.

| samples, markers | GEMMA     | FaST-LMM        |
|------------------|-----------|-----------------|
| 5K, 500K         | 581m 46s  | 183m 56s        |
| 10K, 1M          | 2989m 13s | NA <sup>1</sup> |

<sup>1</sup>Requires more than 64Gb of memory
